# Supplementary material for: Multicopy Chromosome Integration and Deletion of Negative Global Regulators Significantly Increased the Heterologous Production of Aborycin in Streptomyces coelicolor
Source: MDPI journal article supplement (doi:10.3390/md21100534), 2023-10-13
Supplement: s1 [file s1]

# Multicopy Chromosome Integration and Deletion of Negative Global Regulators Significantly Increased the Heterologous Production of Aborycin in *Streptomyces coelicolor*

## Supplementary Figures and Tables

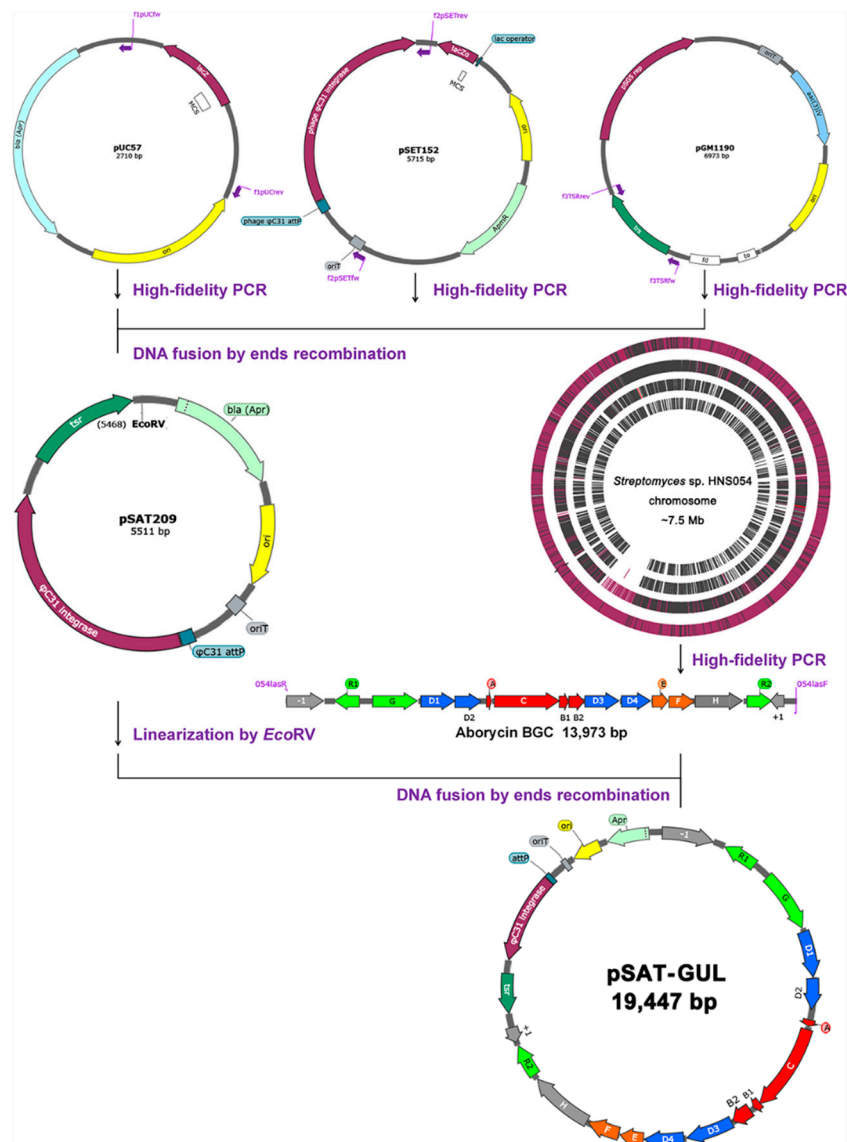

**Figure S1 Construction of the integrative vector for aborycin expression.** The f1 fragment (*bla*+*ori<sup>UC</sup>*) was amplified from the pUC57 plasmid by primers f1pUCfw and f1pUCrev. The f2 fragment (*oriT*+*attP*+*int*) was amplified from the pSET152 plasmid by primers f2pSETfw and f2pSETrev. And the f3 fragment (*tsr*) was amplified from the pGM1190 plasmid by primers f3TSRfw and f3TSRrev2. Then, the three fragments were fused into the integrated plasmid

pSAT209 by using a Multi-fragment Assembly Kit (CAT # C113, Vazyme, Nanjing, China). By using the same assembly kit, the *EcoRV*-linearized pSAT209 was fused with the 14 Kb aborycin BGC fragment, which was amplified from the genomic DNA of the HNS054 strain with primers 054LasF and 054LasR, to form the final integrative vector pSAT-GUL. Colonies were screened by PCR with primers gul-cF and gul-cR. The positive pSAT-GUL plasmid was whole-sequenced to confirm sequence accuracy. All high-fidelity PCR reactions were performed by using a DNA polymerase 2×Phanta Max Kit (CAT # P515, Vazyme, Nanjing, China).

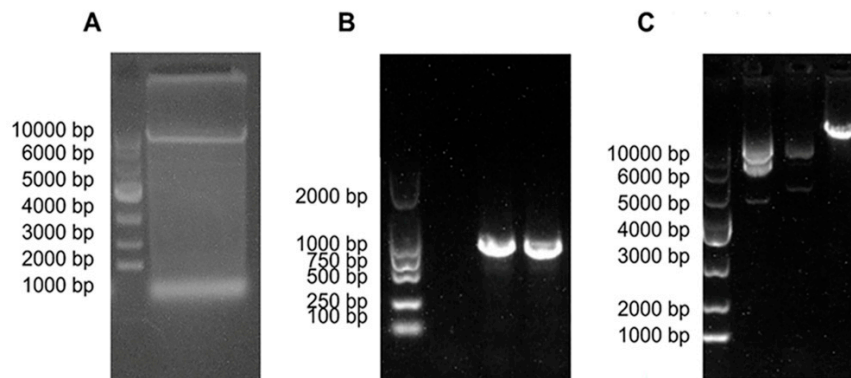

**Figure S2 Cloning of the *gul* gene cluster.** (A) **Amplification of the *gul* gene cluster.** From left to right, DNA marker and the PCR fragment of *gul* gene cluster. (B) **Screening of vector pSAT-GUL.** From left to right, DNA marker, PCR fragments with primers *gul*-cF and *gul*-cR from blank control and two positive pSAT-GUL colonies. (C) **Plasmids.** From left to right, DNA marker, plasmid pSAT209, pSET152 and pSAT-GUL.

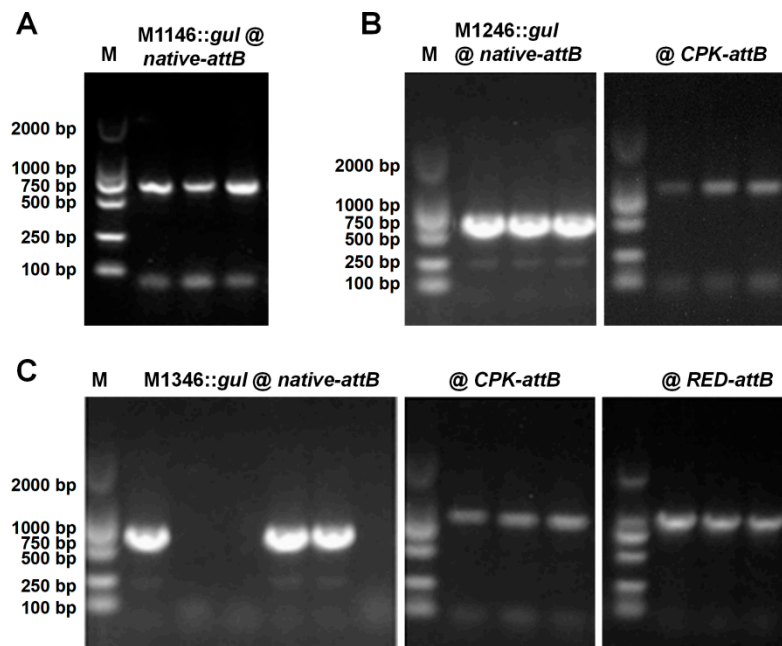

**Figure S3. PCR validation of *gul* cluster integration in the *attB* loci.** A. Exconjugants were checked for M1146::*gul* integration at the native *attB* locus. Positive integration resulted in a 557 bp band. B. Exconjugants were checked for M1246::2*gul* integration at the native and CPK *attB* loci. Positive integration resulted in a 557 bp and a 773 bp band, respectively. C. Exconjugants were checked for M1346::3*gul* integration at the native, CPK and RED *attB* loci. Positive integration resulted in a 557 bp, a 773 bp and an 887 bp band, respectively.

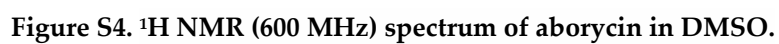

**Figure S4.  $^1\text{H}$  NMR (600 MHz) spectrum of aborycin in DMSO.**

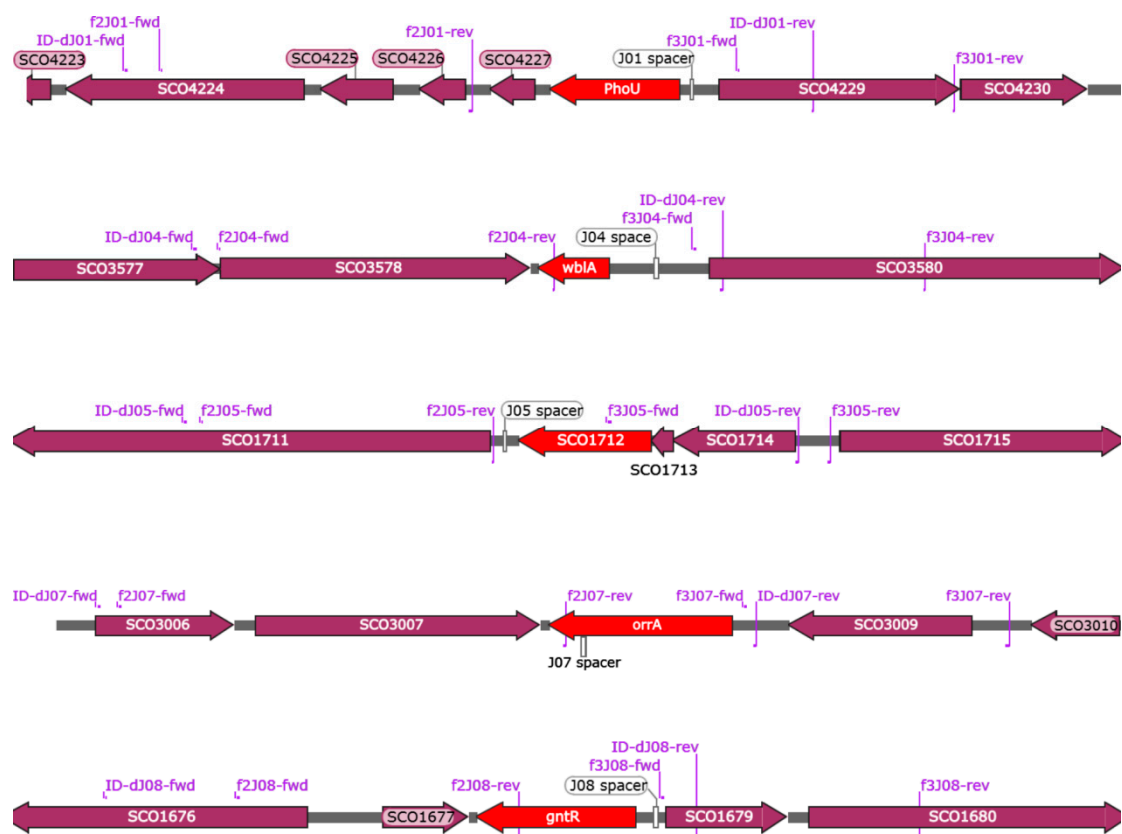

**Figure S5 CRISPR/Cas9 constructions of the five gene-knockout mutants from M1346::3gul.** Gene organizations, spacer positions and primers for deletion of *phoU*, *wblA*, *SCO1712*, *orrA* and *gntR* genes, respectively.

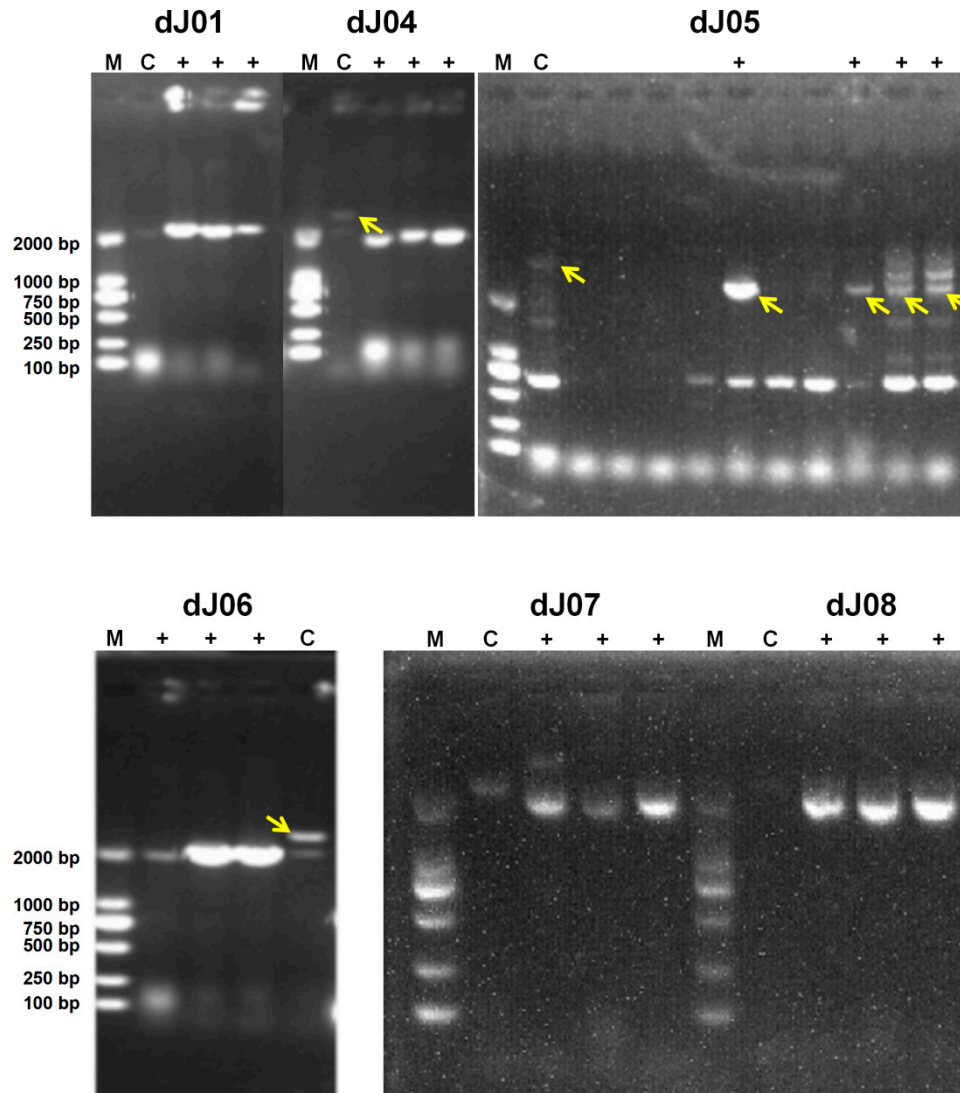

**Figure S6 PCR screening for positive mutants.** d01 - d08 shows screening for  $\Delta phoU$ ,  $\Delta wblA$ ,  $\Delta SCO1712$ ,  $\Delta orrA$  and  $\Delta gntR$  mutants of M1346::3gul, respectively. C, the control strain M1346::3gul. M, DNA marker. +, positive exconjugant. Yellow arrow, to indicate the correct band. All correct bands from the positive exconjugants were sequenced to confirm the success of deletion.

**Table S1 Information of plasmids and strains**

| Plasmids                       | Relevant features                                                                                                                        | Source/Reference  |
|--------------------------------|------------------------------------------------------------------------------------------------------------------------------------------|-------------------|
| pGM1190                        | <i>tsr, rep<sup>SG5</sup>, oriT, acc(3)IV, ori<sup>pUC</sup></i>                                                                         | [46]              |
| pSET152                        | <i>oriT, attP<sub>ΦC31</sub>, int<sub>ΦC31</sub>, lacZ<math>\alpha</math>, ori<sup>pUC</sup>, acc(3)IV</i>                               | [43]              |
| pUC57                          | <i>bla, ori<sup>pUC</sup>, lacZ<math>\alpha</math></i>                                                                                   | Thermo Scientific |
| pSAT209                        | <i>tsr, oriT, attP<sub>ΦC31</sub>, int<sub>ΦC31</sub>, bla, ori<sup>pUC</sup></i>                                                        | This study        |
| pSAT-GUL                       | <i>tsr, oriT, attP<sub>ΦC31</sub>, int<sub>ΦC31</sub>, bla, ori<sup>pUC</sup>, gul</i>                                                   | This study        |
| pKCCas9                        | <i>acc(3)IV, ori<sup>pUC</sup>, rep<sup>SG5</sup>, oriT, tipA-Scocas9</i>                                                                | [24]              |
| pKCCas9dO                      | <i>acc(3)IV, ori<sup>pUC</sup>, rep<sup>SG5</sup>, oriT, tipA-Scocas9, j23119-actII-orf4-gRNA, homologous region flanking actII-orf4</i> | [24]              |
| pKCCas9-dJ01                   | <i>acc(3)IV, ori<sup>pUC</sup>, rep<sup>SG5</sup>, oriT, tipA-Scocas9, j23119-J01spacer-gRNA, homologous region flanking phoU</i>        | This study        |
| pKCCas9-dJ04                   | <i>acc(3)IV, ori<sup>pUC</sup>, rep<sup>SG5</sup>, oriT, tipA-Scocas9, j23119-J04spacer-gRNA, homologous region flanking wblA</i>        | This study        |
| pKCCas9-dJ05                   | <i>acc(3)IV, ori<sup>pUC</sup>, rep<sup>SG5</sup>, oriT, tipA-Scocas9, j23119-J05spacer-gRNA, homologous region flanking SCO1712</i>     | This study        |
| pKCCas9-dJ07                   | <i>acc(3)IV, ori<sup>pUC</sup>, rep<sup>SG5</sup>, oriT, tipA-Scocas9, j23119-J07spacer-gRNA, homologous region flanking orrA</i>        | This study        |
| pKCCas9-dJ08                   | <i>acc(3)IV, ori<sup>pUC</sup>, rep<sup>SG5</sup>, oriT, tipA-Scocas9, j23119-J08spacer-gRNA, homologous region flanking gntR</i>        | This study        |
| Strains                        | Relevant features                                                                                                                        | Source/Reference  |
| <i>E.coli</i> ET12567(pUZ8002) | <i>dam, dcm, hsdS, cat, tet, tra, neo, RP4</i>                                                                                           | [47]              |
| <i>Streptomyces</i> sp. HNS054 | Source strain of the aborycin gene cluster<br><i>glu</i>                                                                                 | [5]               |
| <i>S.coelicolor</i> M1146      | <i>S. coelicolor</i> M145 (contains one native <i>attB<sub>ΦC31</sub></i> ) $\Delta act$ , $\Delta red$ , $\Delta cpk$ , $\Delta cda$    | [48]              |



|                              |                                                                                                                         |            |
|------------------------------|-------------------------------------------------------------------------------------------------------------------------|------------|
| <i>S.coelicolor</i> M1246    | <i>S. coelicolor</i> M1146 $\Delta cpk::attB_{\Phi C31}$                                                                | [25]       |
| <i>S.coelicolor</i> M1346    | <i>S. coelicolor</i> M1246 $\Delta red::attB_{\Phi C31}$                                                                |            |
| <i>S.coelicolor</i> M1446    | <i>S.coelicolor</i> M1346 $\Delta cda::attB_{\Phi C31}$                                                                 |            |
| <i>S.coelicolor</i> M1546    | <i>S.coelicolor</i> M1446 $\Delta act::attB_{\Phi C31}$                                                                 |            |
| M1146:: pSAT209              | <i>S.coelicolor</i> M1146 integrates one copy of pSAT209 at the native <i>attB</i> <sub><math>\Phi C31</math></sub>     | This study |
| M1146::gul                   | <i>S.coelicolor</i> M1146 integrates one copy of pSAT-GUL at the native <i>attB</i> <sub><math>\Phi C31</math></sub>    | This study |
| M1246::2gul                  | <i>S.coelicolor</i> M1246 integrates two copy of pSAT-GUL at two <i>attB</i> <sub><math>\Phi C31</math></sub> sites     | This study |
| M1346::3gul                  | <i>S.coelicolor</i> M1346 integrates three copy of pSAT-GUL at three <i>attB</i> <sub><math>\Phi C31</math></sub> sites | This study |
| M1346::3gul $\Delta phoU$    | <i>S.coelicolor</i> M1346::3gul without the <i>phoU</i> gene                                                            | This study |
| M1346::3gul $\Delta wblA$    | <i>S.coelicolor</i> M1346::3gul without the <i>wblA</i> gene                                                            | This study |
| M1346::3gul $\Delta SCO1712$ | <i>S.coelicolor</i> M1346::3gul without the <i>SCO1712</i> gene                                                         | This study |
| M1346::3gul $\Delta orrA$    | <i>S.coelicolor</i> M1346::3gul without the <i>orrA</i> gene                                                            | This study |
| M1346::3gul $\Delta gntR$    | <i>S.coelicolor</i> M1346::3gul without the <i>gntR</i> gene                                                            | This study |

**Table S2 Primer sequence used in this study**

| Primers            | Sequence (5'-3')                             |
|--------------------|----------------------------------------------|
| 054lasF            | cgattcgctcagtgatgatcTCCGTTGGCAAGGTTTGATGTG   |
| 054lasR            | aaggatccactagtgatcACGACGAGAAGGAGACCGAGG<br>C |
| f1pUCfw            | gaaatggACCGTCATCACCGAAAC                     |
| f1pUCrev           | gccaaccaATAACGCAGGAAAGAACAT                  |
| f2pSETfw           | gcgttatTGGTTGGCTTGGTTTCAT                    |
| f2pSETrev          | ccgctctCACGCCCTCCTACATCG                     |
| f3TSRfw            | agggcgtgAGAGCGGGGAGCTTTG                     |
| f3TSRrev           | atgacggtCCATTTCTGGGTCCTGTTG                  |
| gul-cF             | TGTCTATCGCTCCTTCGTTTCCA                      |
| gul-cR             | GTCTCCCTGCTCTTCACCTCGTT                      |
| ID-oriT-fw         | gcagagcaggattcccgtagca                       |
| ID-native-attB-rev | acgtcccggtgctcaccgtgacca                     |

|                 |             |                                                                      |
|-----------------|-------------|----------------------------------------------------------------------|
| ID-CPK-attB-rev |             | cccatgctgtgccgaagaa                                                  |
| ID-RED-attB-rev |             | tccagcgcttggtggcgtagcgtt                                             |
| ID-CDA-attB-rev |             | catgacgcaacgcgaagaagagct                                             |
| ID-ACT-attB-rev |             | tggtcaccgtctccatgggtcatgt                                            |
| f1gRNA-R        |             | gtggaattcagatctcaaaaa                                                |
| J01 set         | f1J01-fwd   | agtcctaggtataataactagtGCCCCACGCTTACACGTTC<br>gttttagagctagaaatagca   |
|                 | f2J01-fwd   | ttttgagatctgaattccacAGGAACTGCGGGGTGGA                                |
|                 | f2J01-rev   | CTGGAAGGAGGACCCTGAAG                                                 |
|                 | f3J01-fwd   | cttcagggtctctctccagGAGCGGGAGCAGAAGCG                                 |
|                 | f3J01-rev   | acgacggccagtgccaagcttCGAACGGGGCTGTATGGG                              |
|                 | ID-dJ01-fwd | ccgttggtgtccagaagc                                                   |
|                 | ID-dJ01-rev | cagctcgtggctcacgttg                                                  |
| J04 set         | f1J04-fwd   | agtcctaggtataataactagtTCATCTCTGTTGCGCCACAAG<br>tttttagagctagaaatagca |
|                 | f2J04-fwd   | ttttgagatctgaattccacTGCGGAAGCAGGGGATC                                |
|                 | f2J04-rev   | GCGGACGGAGTACGAACG                                                   |
|                 | f3J04-fwd   | CTCGTTCGTACTIONCCGTCCGCTCACTGCTGTGACA<br>GTTGAGTGC                   |
|                 | f3J04-rev   | acgacggccagtgccaagcttAGCGTCGTGCGGATGG                                |
|                 | ID-dJ04-fwd | CGCTGGAGCAGGAGCAG                                                    |
|                 | ID-dJ04-rev | TGACACCGAGGAACTTGGC                                                  |
| J05 set         | f1J05-fwd   | agtcctaggtataataactagtCGGTAGGCATGTTGGGGAGG<br>gttttagagctagaaatagca  |
|                 | f2J05-fwd   | gaattccacGTGTTGAAGGCCAAGTCGTGG                                       |
|                 | f2J05-rev   | aacaagcgccagatggTTCCGGGAGGACCCGTGC                                   |
|                 | f3J05-fwd   | ggaaCCATCTGGCGCTTGTGTC                                               |
|                 | f3J05-rev   | acgacggccagtgccaagcttCGTAGGATTGCGGTTTCCC                             |
|                 | ID-dJ05-fwd | ATCTCCGTCTCGGCCATCCTG                                                |
|                 | ID-dJ05-rev | CCCGTGTCTAGTCTCGCGTCAT                                               |
| J07 set         | f1J07-fwd   | agtcctaggtataataactagtGTCCCGTTGTTTATTCCCGg<br>tttttagagctagaaatagca  |
|                 | f2J07-fwd   | ttttgagatctgaattccacGGACCCCGACATCCAACG                               |
|                 | f2J07-rev   | GGAGAACTCCAGCTGCACTC                                                 |
|                 | f3J07-fwd   | gagtgcagctggagtttctcGCCAACCCAGAGCAACGA                               |
|                 | f3J07-rev   | acgacggccagtgccaagcttGCGAGATATGTTCCGTTGTG<br>AG                      |
|                 | ID-dJ07-fwd | AACCCGTCACGCTCACC                                                    |
|                 | ID-dJ07-rev | GGGCATGGAATCATGGC                                                    |
| J08 set         | f1J08-fwd   | agtcctaggtataataactagtGTTTCAGTTGCGTCGACATCg<br>tttttagagctagaaatagca |
|                 | f2J08-fwd   | ttttgagatctgaattccacGTGGGTCCAGTCGTCCG                                |
|                 | f2J08-rev   | GTCGTCGCCGAGGTCC                                                     |

|             |                                              |
|-------------|----------------------------------------------|
| f3J08-fwd   | gccaggacctcggcgacgacCGACGAAGACAGCAGACA<br>GC |
| f3J08-rev   | acgacggccagtgccagcttCCGCATCAGCGAGTAGTTG      |
| ID-dJ08-fwd | GGTGTGCTCAGGGTGGC                            |
| ID-dJ08-rev | CGGAGGGTGGAAGTCGTC                           |

**Table S3 The length of RiPP biosynthetic gene clusters**

| Class/example  | Length     | Reference |
|----------------|------------|-----------|
| Proteusins     | 13.6kb     | [9]       |
| Lasso peptides |            | [49]      |
| MS-271         | 14kb       |           |
| (siamycin)     |            |           |
| specialicin    | 14kb       |           |
| Thiopeptides   |            | [50]      |
| thiomuracin    | 13.4kb     |           |
| berninamycin   | 11kb       |           |
| lactazole      | 8.4kb      |           |
| Linaridins     |            | [51]      |
| cypemycin      | 8.5kb      |           |
| legonaridin    | 8.5kb      |           |
| Cyanobactins   | <10kb      | [52]      |
| Bottromycins   | 17kb       | [53]      |
| Microviridin   | 6.8kb      | [54]      |
| Glycocins      | 4kb        | [55]      |
| Microcins      |            | [56]      |
| Class I        | 4-5.5kb    |           |
| Class II       | 3.5-4kb    |           |
| Class III      | 8.5-11.5kb |           |

**Table S4 RiPP examples reported by Montalbán-López et al. [32]**

| Class/example                    | length |
|----------------------------------|--------|
| Crocagins/Crocagin A             | 13kb   |
| <i>Sulfatytrotides/RaxX</i>      | 4kb    |
| Darobactin                       | 7kb    |
| Tryptorubin A                    | 4kb    |
| Cacaoidin                        | 28kb   |
| Cittilins/Cittilin A             | 1.9kb  |
| <i>Lipolanthines/Microvionin</i> | 23kb   |
| Thiopeptide/Thiomuracin          | 13kb   |

|                                    |      |
|------------------------------------|------|
| Linaridin/Cypemycin                | 13kb |
| LAP /Microcin B17                  | 6kb  |
| Thioamitide/Thioholgamide          | 10kb |
| <i>Thioamitides/Thioviridamide</i> | 11kb |
| Cyanobactin /Patellamide           | 13kb |
| Bottromycins /Bottromycin A1       | 18kb |
| Lasso peptide/Microcin J25         | 6kb  |
| Sactipeptide/Subtilosin A          | 8kb  |
| Ranthipeptide/Freyrasin            | 4kb  |
| <i>Streptide</i> /Streptide        | 4kb  |
| Epeptides/Yyd                      | 5kb  |
| Spliceotides/Plp                   | 12kb |
| Graspetide/Microviridin J          | 3kb  |
| Dikaritins/Ustiloxin               | 20kb |
| Asperipin 2a                       | 5kb  |
| Phomopsins                         | 20kb |
| Pheganomycin                       | 28kb |
| Pyrroloquinoline quinones/PQQ      | 9kb  |
| <i>Mycofactocin/Mycofactocin</i>   | 15kb |
| Methanobactins/Methanobactin       | 13kb |
| 3-thiaglutarate                    | 15kb |
| Aeruginosamide B                   | 15kb |
| Landornamide                       | 14kb |
| Goadsporin                         | 23kb |
| Thiocillin                         | 16kb |

---
